# Supplementary material
Source: ML conference proceedings conference paper supplement (https://proceedings.mlr.press/v97/jeong19d.html)
Supplement: Supplementary file [file jeong19d-supp.pdf]

---

# Supplementary Material for Learning Discrete and Continuous Factors of Data via Alternating Disentanglement

---

Yeonwoo Jeong Hyun Oh Song

## A. Proofs

### A.1. Proof of Proposition 1

**Proposition 1.** *The mutual information between one dimension of a random variable and the rest can be factorized as*

$$I(z_{1:i-1}; z_i) = TC(z_{1:i}) - TC(z_{1:i-1})$$

*Proof.* First recall the definition of total correlation,

$$TC(z_{1:i}) = D_{\text{KL}} \left( p(z_{1:i}) \parallel \prod_{j=1}^i p(z_j) \right)$$

Then, we have

$$\begin{aligned} TC(z_{1:i}) - TC(z_{1:i-1}) &= \int p(z_{1:i}) \log \frac{p(z_{1:i})}{\prod_{j=1}^i p(z_j)} dz_{1:i} \\ &\quad - \int p(z_{1:i-1}) \log \frac{p(z_{1:i-1})}{\prod_{j=1}^{i-1} p(z_j)} dz_{1:i-1} \\ &= \int p(z_{1:i}) \log \frac{p(z_{1:i})}{\prod_{j=1}^i p(z_j)} dz_{1:i} \\ &\quad - \int p(z_{1:i}) \log \frac{p(z_{1:i-1})}{\prod_{j=1}^{i-1} p(z_j)} dz_{1:i} \\ &= \int p(z_{1:i}) \log \frac{p(z_{1:i})}{p(z_{1:i-1})p(z_i)} dz_{1:i} \\ &= I(z_{1:i-1}; z_i) \end{aligned}$$

variables  $p(z_1, z_2|x) = p(z_1|x)p(z_2|x)$ ,

$$\begin{aligned} I(x; [z_1, z_2]) &= \int p(x, z_1, z_2) \log \frac{p(x, z_1, z_2)}{p(x)p(z_1, z_2)} dz_1 dz_2 dx \\ &= \int p(x, z_1, z_2) \log \left( \frac{p(x, z_1, z_2)}{p(x)p(z_1, z_2)} \cdot \frac{p(x)p(z_1)}{p(x, z_1)} \right. \\ &\quad \left. \cdot \frac{p(x)p(z_2)}{p(x, z_2)} \cdot \frac{p(z_1, z_2)}{p(z_1)p(z_2)} \right) dz_1 dz_2 dx \\ &\quad + \int p(x, z_1, z_2) \log \frac{p(x, z_1)}{p(x)p(z_1)} dx dz_1 dz_2 \\ &\quad + \int p(x, z_1, z_2) \log \frac{p(x, z_2)}{p(x)p(z_2)} dx dz_1 dz_2 \\ &\quad - \int p(x, z_1, z_2) \log \frac{p(z_1, z_2)}{p(z_1)p(z_2)} dx dz_1 dz_2 \\ &= \int p(x, z_1, z_2) \log \frac{p(x, z_1, z_2)}{p(x)} \cdot \frac{p(x)}{p(x, z_1)} \cdot \frac{p(x)}{p(x, z_2)} dz_1 dz_2 dx \\ &\quad + \int p(x, z_1) \log \frac{p(x, z_1)}{p(x)p(z_1)} dx dz_1 \\ &\quad + \int p(x, z_2) \log \frac{p(x, z_2)}{p(x)p(z_2)} dx dz_2 \\ &\quad - \int p(z_1, z_2) \log \frac{p(z_1, z_2)}{p(z_1)p(z_2)} dz_1 dz_2 \\ &= \int p(x)p(z_1, z_2|x) \log \frac{p(z_1, z_2|x)}{p(z_1|x)p(z_2|x)} dz_1 dz_2 dx \\ &\quad + I(x; z_1) + I(x; z_2) - I(z_1; z_2) \\ &= \mathbb{E}_{x \sim p(x)} \left[ \int p(z_1, z_2|x) \log \frac{p(z_1, z_2|x)}{p(z_1|x)p(z_2|x)} dz_1 dz_2 \right] \\ &\quad + I(x; z_1) + I(x; z_2) - I(z_1; z_2) \\ &= I(x; z_1) + I(x; z_2) - I(z_1; z_2) \end{aligned}$$

□

□

### A.2. Proof of Proposition 2

**Proposition 2.** *The mutual information between  $x$  and partitions of  $z = [z_1, z_2]$  can be factorized as,*

$$I(x; [z_1, z_2]) = I(x; z_1) + I(x; z_2) - I(z_1; z_2)$$

*Proof.* Recall the conditional independence of the latent

## B. Implementation details

We follow the Network architecture in (Dupont, 2018). We use  $[0, 1]$  normalized image data. Appendix B is the model architecture for  $64 \times 64$  images (Chairs and dSprites). MNIST and FashionMNIST (which is  $28 \times 28$ ) is resized to  $32 \times 32$  and architecture in Appendix B was used. Batch

size for training is fixed with 64.  $\beta_h$  is fixed with 10.0 for our experiments.

| Encoder                                | Decoder                                   |
|----------------------------------------|-------------------------------------------|
| 4 × 4 conv 32,ReLU, stride 2           | input dim × 256 fully connected, ReLU     |
| 4 × 4 conv 32,ReLU, stride 2           | 256 × 64 × 4 × 4 fully connected, ReLU    |
| 4 × 4 conv 64,ReLU, stride 2           | 4 × 4 conv transpose 64, ReLU, stride 2   |
| 4 × 4 conv 64,ReLU, stride 2           | 4 × 4 conv transpose 32, ReLU, stride 2   |
| 64 × 4 × 4 × 256 fully connected, ReLU | 4 × 4 conv transpose 32, ReLU, stride 2   |
| 256 × output dim fully connected       | 4 × 4 conv transpose 1, Sigmoid, stride 2 |

Table 1. Encoder and decoder architecture for Dsprites and Chairs data

| Encoder                                | Decoder                                   |
|----------------------------------------|-------------------------------------------|
| 4 × 4 conv 32,ReLU, stride 2           | input dim × 256 fully connected, ReLU     |
| 4 × 4 conv 32,ReLU, stride 2           | 256 × 64 × 4 × 4 fully connected, ReLU    |
| 4 × 4 conv 64,ReLU, stride 2           | 4 × 4 conv transpose 32, ReLU, stride 2   |
| 64 × 4 × 4 × 256 fully connected, ReLU | 4 × 4 conv transpose 32, ReLU, stride 2   |
| 256 × output dim fully connected       | 4 × 4 conv transpose 1, Sigmoid, stride 2 |

Table 2. Encoder and decoder architecture for MNIST and FashionMNIST

### B.1. dSprites

- Dimension of discrete : 3
- Optimizer: Adam with learning rate 3e-4
- $\lambda'$  : 0.001
- $r$  : 2e4
- $t_d$  : 1e5
- Iterations : 3e5

### B.2. MNIST

- Dimension of discrete : 10
- Optimizer : Adam with learning rate 3e-4
- $\lambda'$  : 0.1
- $r$  : 1e4
- $t_d$  : 0
- Iterations : 1.2e5

### B.3. FashionMNIST

- Dimension of discrete : 10
- Optimizer : Adam with learning rate 1e-4
- $\lambda'$  : 0.1
- $r$  : 1e4
- $t_d$  : 0
- Iterations : 1.2e5

### B.4. Chairs

- Dimension of discrete : 3
- Optimizer: Adam with learning rate 1e-4
- $\lambda'$  : 0.01
- $r$  : 2e4
- $t_d$  : 6e4
- Iterations : 1.5e5

### C. Disentanglement score

We follow the disentanglement score details from (Kim & Mnih, 2018) and (Dupont, 2018). At first, we prune out all latent dimensions where variational posterior collapses to the prior. Concretely, we prune the continuous latent dimension  $z_j$  where

$$\mathbb{E}_{x \sim p(x)} D_{\text{KL}}(q_\phi(z_j | x) \| p(z_j)) < 0.1 .$$

We evaluate disentanglement score with the surviving dimensions. We choose a factor  $k$  from  $K$  factors (*i.e.* position  $x$ , position  $y$ , rotation, scale, shape). Then, we obtain the representations from  $L$  ( $= 100$ ) data of which factor  $k$  is fixed and the other factors are randomly chosen. We take the empirical variance of each latent dimensions and normalize with each empirical variance over the full data<sup>1</sup>. Concretely, the empirical variance on  $j$  latent dimension<sup>2</sup>, is defined as

$$\widehat{\text{Var}}_j = \frac{1}{2N(N-1)} \sum_{p,q=1}^N d(x_p, x_q),$$

where  $d(x_p, x_q) = \begin{cases} \mathbb{I}(x_p \neq x_q) & \text{if } j = m + 1 \\ (x_p - x_q)^2 & \text{otherwise} \end{cases}$ . This procedure generates a vote  $(j, k)$  where

$$j = \underset{j^*}{\text{argmin}} \frac{1}{v_{j^*}} \widehat{\text{Var}}_{j^*}.$$

We generate  $M$  ( $= 800$ ) votes  $(a_i, b_i)_{i=1}^M$ . Let  $V_{jk} = \sum_{i=1}^M \mathbb{I}(a_i = j, b_i = k)$ . Concretely, the disentanglement score is

$$\frac{1}{M} \sum_j \max_k V_{jk}.$$

Random chance algoirhtm takes  $\frac{1}{K}$  as a accuracy.

<sup>1</sup>We denote the empirical variance of latent dimension  $j$  on full data,  $v_j$ .

<sup>2</sup>For convenience,  $z_{m+1} = d$ .

## References

- Dupont, E. Learning disentangled joint continuous and discrete representations. In *NIPS*, 2018.
- Kim, H. and Mnih, A. Disentangling by factorising. In *ICML*, 2018.
